# Supplementary material
Source: publisher site journal article supplement (https://www.spandidos-publications.com/2499/downloadSupplementary)
Supplement: Supplementary file 1 [file downloadSupplementary]

## Sheet: Sheet1
Table SI. Clinicopathological characteristics of patients.
Case ID	Age, years	Sex	T	N	M	Stage	Status
TCGA-AH-6897	48	male	T2	N0	M0	Stage I	Alive
TCGA-AG-3732	78	female	T2	N0	M0	Stage I	Alive
TCGA-DC-6160	68	male	T2	N0	M0	Stage I	Alive
TCGA-AG-3581	63	male	T2	N0	M0	Stage I	Alive
TCGA-AG-3599	70	male	T2	N0	M0	Stage I	Alive
TCGA-AF-2693	75	male	T2	N0	MX	Stage I	Alive
TCGA-AF-2691	48	female	T1	N0	M0	Stage I	Alive
TCGA-DC-5337	69	male	T1	N0	M0	Stage I	Alive
TCGA-DC-4749	57	male	T2	N0	M0	Stage I	Alive
TCGA-AG-3580	67	male	T1	N0	M0	Stage I	Alive
TCGA-AF-5654	73	female	T2	N0	M0	Stage I	Dead
TCGA-DC-6157	48	male	T2	N0	M0	Stage I	Alive
TCGA-AF-A56N	47	female	T3	N0	M0	Stage IIA	Alive
TCGA-AG-3591	66	female	T3	N0	M0	Stage IIA	Alive
TCGA-AG-3594	77	male	T3	N0	M0	Stage IIA	Dead
TCGA-AF-3400	54	male	T3	N0	M0	Stage IIA	Alive
TCGA-F5-6811	72	female	T3	N0	M0	Stage IIA	Alive
TCGA-AG-3598	69	male	T3	N0	M0	Stage IIA	Alive
TCGA-DY-A1DC	72	female	T3	N0	M0	Stage IIA	Dead
TCGA-AG-4001	74	female	T3	N0	M0	Stage IIA	Alive
TCGA-DC-6682	57	male	T3	N0	M0	Stage IIA	Alive
TCGA-AF-A56K	56	male	T3	N0	M0	Stage IIA	Alive
TCGA-AG-3592	68	male	T3	N0	M0	Stage IIA	Alive
TCGA-F5-6465	64	female	T3	N0	M0	Stage IIA	Alive
TCGA-AG-3611	72	male	T3	N0	M0	Stage IIA	Alive
TCGA-AG-3578	76	female	T3	N0	M0	Stage IIA	Alive
TCGA-DY-A0XA	57	female	T3	N0	M0	Stage IIA	Alive
TCGA-AG-3593	72	female	T3	N0	M0	Stage IIA	Alive
TCGA-AG-3902	61	male	T3	N0	M0	Stage IIA	Alive
TCGA-AG-3586	72	female	T3	N2	M0	Stage III	Alive
TCGA-AG-3725	90	female	T3	N2	M0	Stage III	Alive
TCGA-AG-3727	78	female	T3	N1	M0	Stage III	Alive
TCGA-AF-6655	66	male	T2	N1	M0	Stage IIIA	Alive
TCGA-DC-6155	31	female	T2	N1b	M0	Stage IIIA	Alive
TCGA-G5-6641	67	male	T1	N1	MX	Stage IIIA	Alive
TCGA-AG-3909	69	female	T3	N1	M0	Stage IIIB	Alive
TCGA-AF-6136	72	female	T3	N1b	MX	Stage IIIB	Alive
TCGA-DC-4745	49	female	T3	N1a	M0	Stage IIIB	Alive
TCGA-AH-6903	46	male	T3	N1b	M0	Stage IIIB	Alive
TCGA-AG-3901	67	female	T3	N1	M0	Stage IIIB	Alive
TCGA-AG-3601	68	male	T4	N1	M0	Stage IIIB	Alive
TCGA-DC-6683	43	male	T3	N1b	M0	Stage IIIB	Alive
TCGA-G5-6235	72	male	T3	N1	MX	Stage IIIB	Alive
TCGA-DY-A1DD	77	female	T3	N1	M0	Stage IIIB	Dead
TCGA-AG-3893	74	male	T3	N1	M0	Stage IIIB	Alive
TCGA-AG-3600	62	male	T3	N2	M0	Stage IIIC	Alive
TCGA-AG-3602	66	female	T3	N2	M0	Stage IIIC	Alive
TCGA-AF-A56L	48	female	T3	N2	M0	Stage IIIC	Alive
TCGA-AF-2687	57	male	T3	N2	M0	Stage IIIC	Alive
TCGA-AH-6643	50	male	T3	N2b	M0	Stage IIIC	Dead
TCGA-AG-3999	61	female	T3	N2	M0	Stage IIIC	Alive
TCGA-DY-A1DF	73	female	T3	N2	M0	Stage IIIC	Dead
TCGA-CL-5917	71	female	T3	N2	MX	Stage IIIC	Alive
TCGA-F5-6464	77	female	T4b	N2a	M0	Stage IIIC	Dead
TCGA-AG-3609	65	female	T3	N2	M0	Stage IIIC	Alive
TCGA-AG-3583	66	male	T3	N2	M1	Stage IV	Dead
TCGA-AF-3913	60	male	T3	N1	M1	Stage IV	Dead
TCGA-AF-2689	41	female	T3	N2	M1	Stage IV	Dead
TCGA-AG-3605	85	female	T3	N1	M1	Stage IV	Alive
TCGA-AF-6672	43	male	T4a	N2b	MX	Stage IV	Alive
TCGA-DC-6154	57	female	T4a	N2b	M1	Stage IVA	Alive
TCGA-DC-6681	70	female	T3	N2a	M1a	Stage IVA	Alive
TCGA-DC-6156	62	male	T4a	N2b	M1a	Stage IVA	Alive
TCGA-F5-6702	71	male	T3	N1	M1	Stage IVA	Dead
TCGA-AH-6644	73	male	T3	NX	MX	--	Alive
TCGA-AH-6544	60	male	T3	N1	M1	--	Alive
TCGA-AH-6547	79	female	T3	N0	MX	--	Dead
TCGA-G5-6572	56	male	--	--	--	--	Dead
TCGA-EI-7004	37	female	T4a	N2b	M0	--	Alive
TCGA, The Cancer Genome Atlas.
